# Supplementary material for: Development and demonstration of highly potent flame-retardant cotton fabric
Source: Royal Society of Chemistry journal article supplement (doi:10.1039/d3re00179b), 2023-01-01
Supplement: d3re00179b1.pdf [file d3re00179b1.pdf]

## Supplementary Information

### Development and demonstration of highly potent flame-retardant cotton fabric.

Mahesh P. Bondarde<sup>a</sup>, Kshama D. Lokhande<sup>a</sup>, Madhuri A Bhakare<sup>a</sup>, Pratik S. Dhumal<sup>a</sup>, and Surajit Some<sup>a\*</sup>

Department of Dyestuff Technology, Institute of Chemical Technology, Matunga, Mumbai-400 019, India.

E-mail: [sr.some@ictmumbai.edu.in](mailto:sr.some@ictmumbai.edu.in)

#### Table of Contents

|                                                                                                                                                             |             |
|-------------------------------------------------------------------------------------------------------------------------------------------------------------|-------------|
| 1) Synthesis and chemical structure of FR-1, FR-2, FR-3 and FR-4 composite-----                                                                             | Figure S1.  |
| 2) Ionic interaction of FR-1 composite with cotton fabric (FR-1@cotton fabric) -----                                                                        | Figure S2.  |
| 3) Ionic interaction of FR-2 composite with cotton fabric (FR-2@cotton fabric) -----                                                                        | Figure S3.  |
| 4) Ionic interaction of FR-3 composite with cotton fabric (FR-3@cotton fabric) -----                                                                        | Figure S4.  |
| 5) Ionic interaction of FR-4 composite with cotton fabric (FR-4@cotton fabric) -----                                                                        | Figure S5.  |
| 6) Digital photograph of the flame-retardant test of control cotton fabric coated with guanidine hydrochloride-----                                         | Figure S6.  |
| 7) Schematic representation for the proposed dehydration of the FR-1 by forming phosphoanhydride by intramolecular as well as intermolecular reaction-----  | Figure S7.  |
| 8) Schematic representation for the proposed dehydration of the FR-2 by forming phosphoanhydride by intramolecular as well as intermolecular reaction-----  | Figure S8.  |
| 9) Schematic representation for the proposed dehydration of the FR-3 by forming phosphoanhydride by intramolecular as well as intermolecular reaction-----  | Figure S9.  |
| 10) Schematic representation for the proposed dehydration of the FR-4 by forming phosphoanhydride by intramolecular as well as intermolecular reaction----- | Figure S10. |
| 11) Digital photograph of (a) Blank sample, (b) FR-4@cotton fabric-----                                                                                     | Figure S11. |
| 12) Tensile strength of FR-4@Cotton fabric-----                                                                                                             | Figure S12. |
| 13) The Weight % and stoichiometric feed ratio of carbon, oxygen, nitrogen and phosphorous of FR-1 to FR-4 material based on XPS data-----                  | Table S1.   |
| 14) LOI (%) value of synthesized material coated cotton fabric with respect to no of coating-----                                                           | Table S2.   |
| 15) Comparative data of as synthesized material with reported material-----                                                                                 | Table S3.   |
| 16) Vertical flammability data of blank cotton fabric with flame retardant material coated cotton fabric-----                                               | Table S4.   |
| 17) Comparative data of as synthesized material with respect to LOI, VFT and observation observed in spirit lamp test-----                                  | Table S5.   |
| 18) Wash fastness Data of FR-4@Cotton fabric without and with Binder/FR-4@Cotton fabric before and after washing % weight loss-----                         | Table S6.   |
| 19) Add on % data of FR-1 material on cotton fabric-----                                                                                                    | Table S7.   |
| 20) Add on % data of FR-2 material on cotton fabric-----                                                                                                    | Table S8.   |
| 21) Add on % data of FR-3 material on cotton fabric-----                                                                                                    | Table S9.   |
| 22) Add on % data of FR-4 material on cotton fabric-----                                                                                                    | Table S10.  |
| 23) Bending length and stiffness data of FR@Cotton fabric-----                                                                                              | Table S11.  |

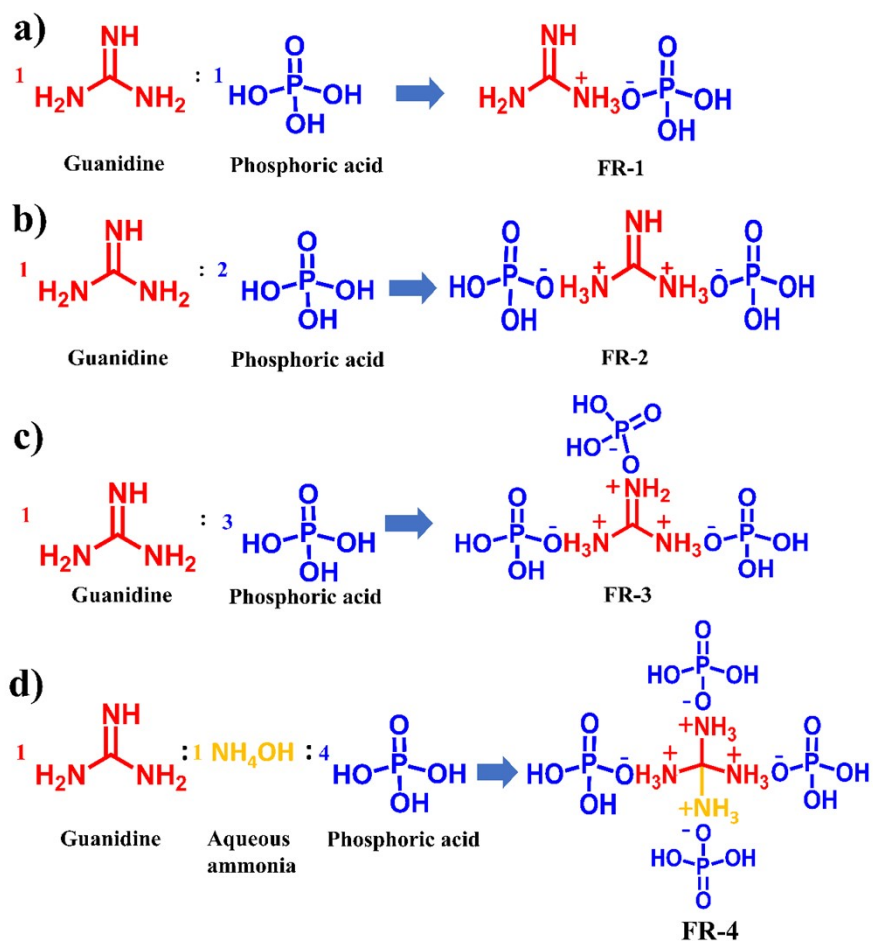

**Figure S1.** Synthesis and chemical structure of a) FR-1, b) FR-2, c) FR-3, and d) FR-4 composite.

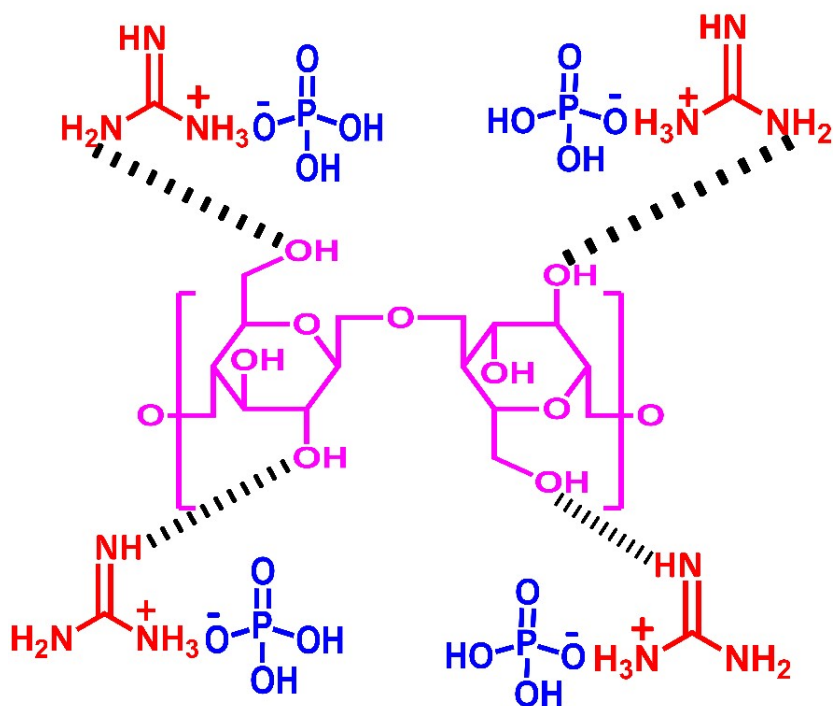

**Figure S2:** Ionic interaction of FR-1 composite with cotton fabric (FR-1@cotton fabric).

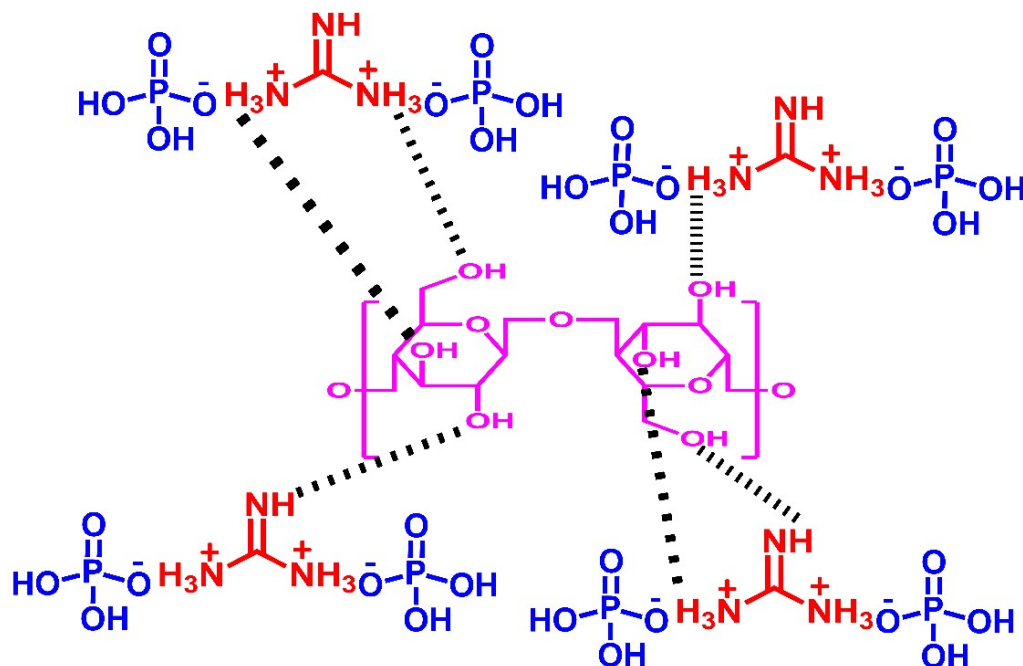

**Figure S3:** Ionic interaction of FR-2 composite with cotton fabric (FR-2@cotton fabric).

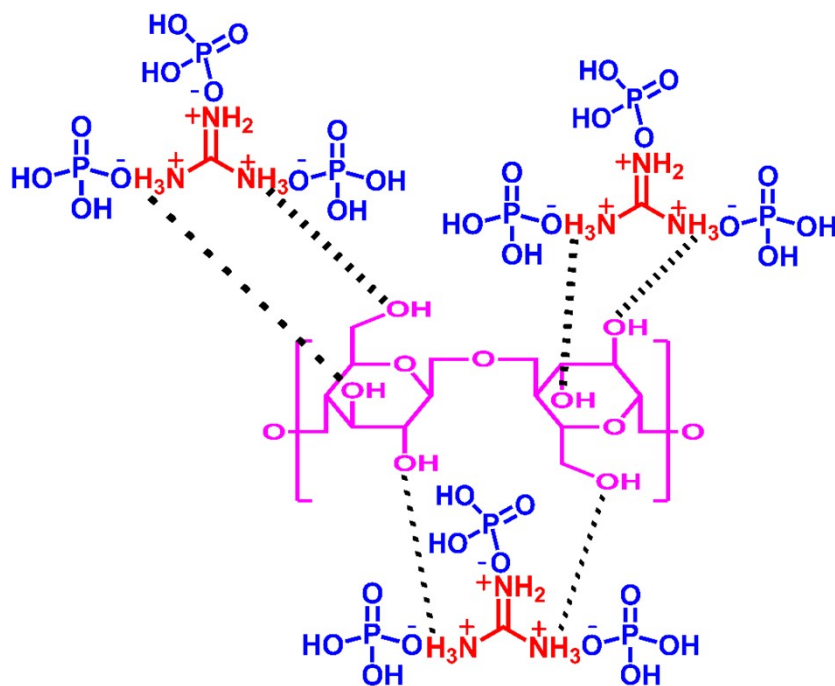

**Figure S4:** Ionic interaction of FR-3 composite with cotton fabric (FR-3@cotton fabric).

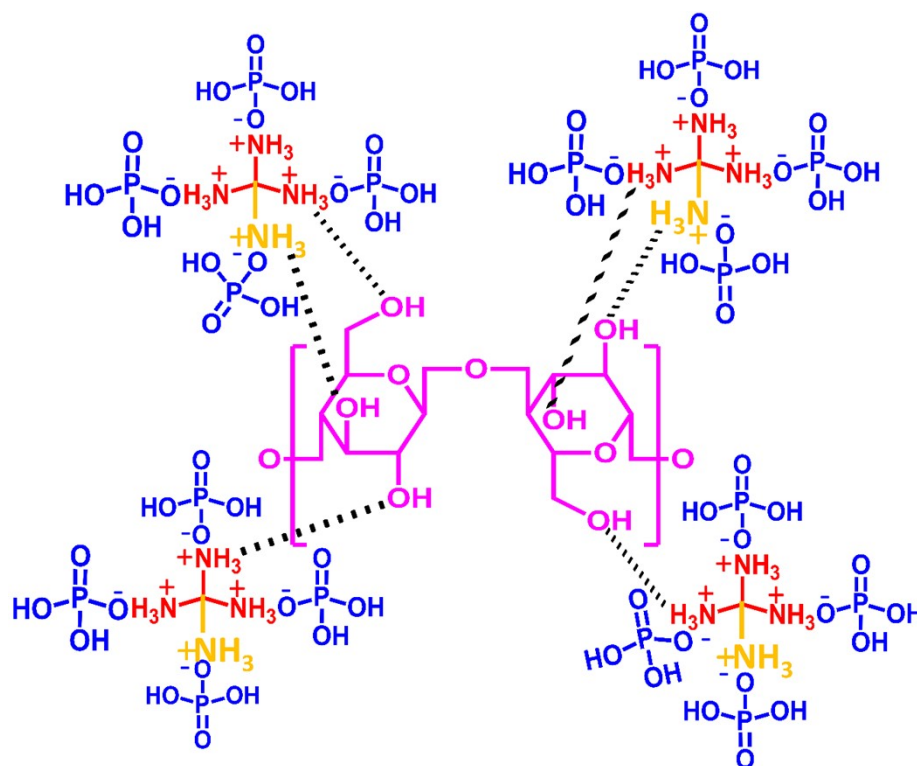

**Figure S5:** Ionic interaction of FR-4 composite with cotton fabric (FR-4@ cotton fabric).

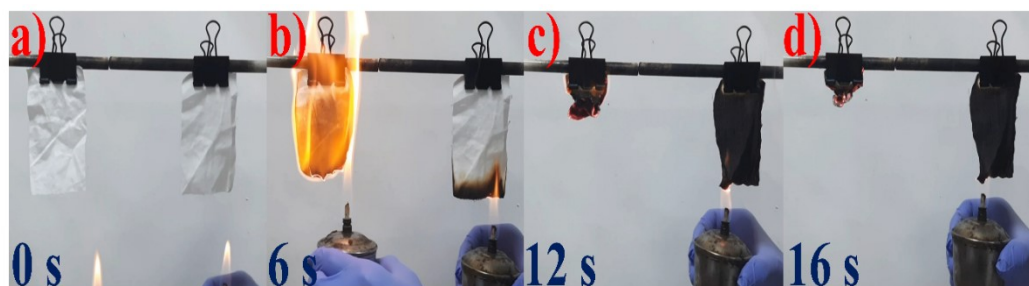

**Figure S6:** Digital photograph of the flame-retardant test of control cotton fabric coated with a-d) guanidine hydrochloride.

In **Figure S6** the guanidine hydrochloride coated cotton fabric catches fire and sustains up to 16 s it may be because of presence of nitrogen functionality. Meanwhile, the control cotton fabric, shrinkage was observed and after flame test, the fabric losses its strength and become brittle. Whereas the blank cotton fabric was burn completely within 14 s.

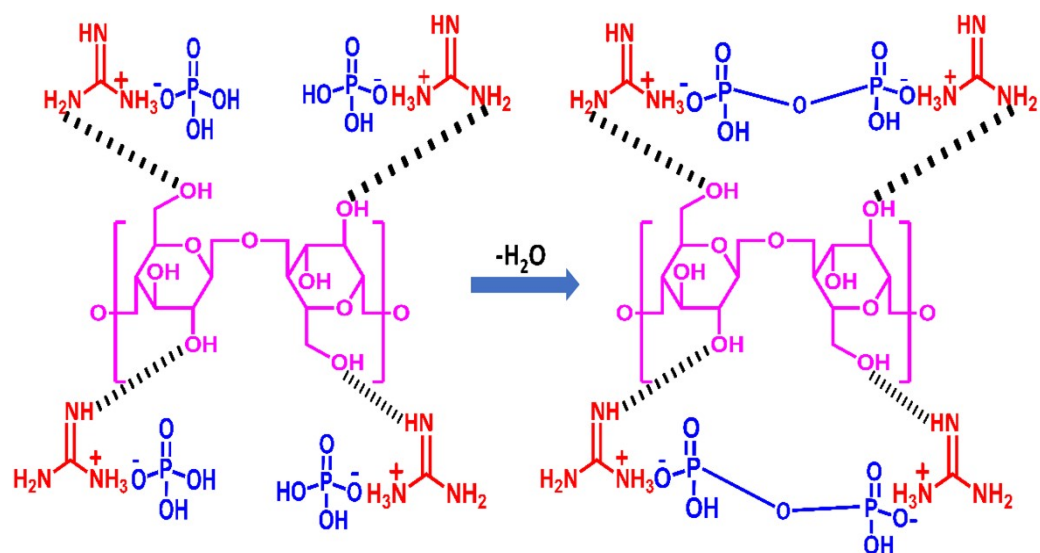

**Figure S7:** Schematic representation for the proposed dehydration of the FR-1 by forming phosphoanhydride by intramolecular as well as intermolecular reaction.

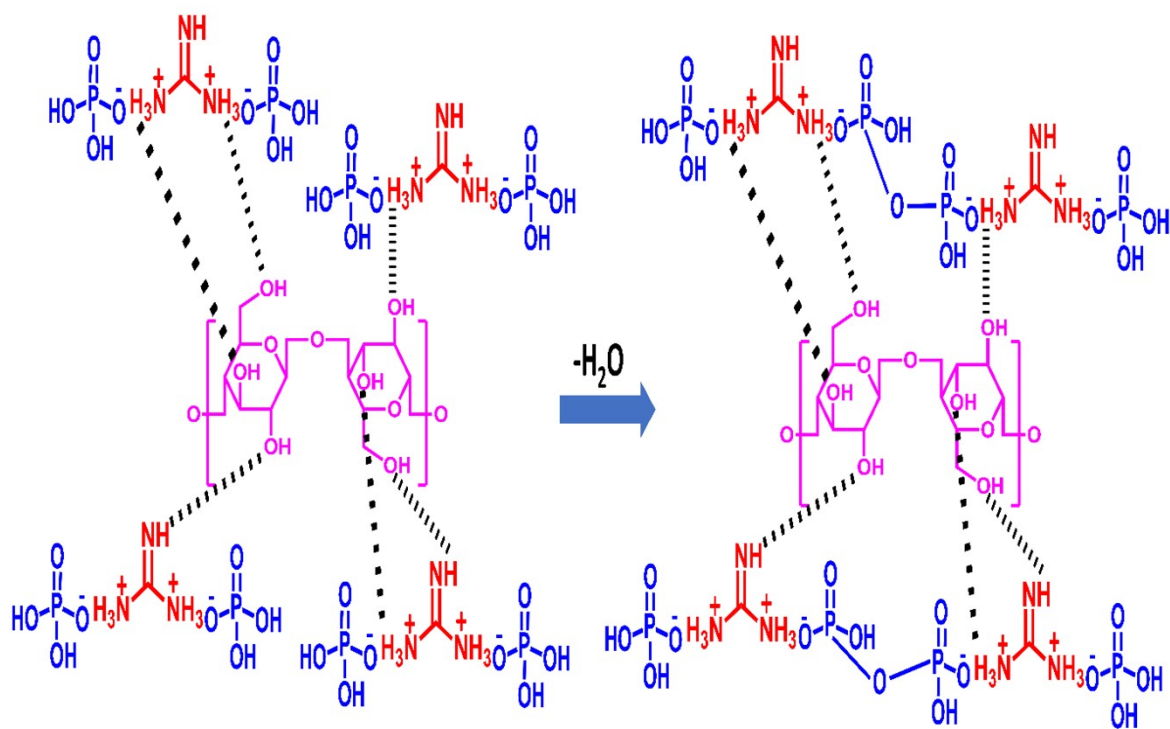

**Figure S8:** Schematic representation for the proposed dehydration of the FR-2 by forming phosphoanhydride by intramolecular as well as intermolecular reaction.



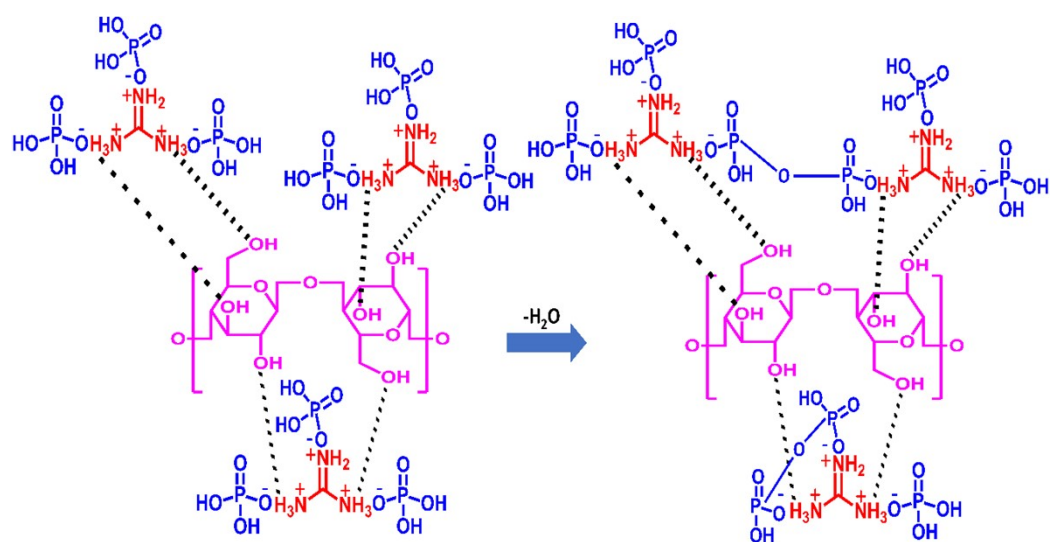

**Figure S9:** Schematic representation for the proposed dehydration of the FR-3 by forming phosphoanhydride by intramolecular as well as intermolecular reaction.

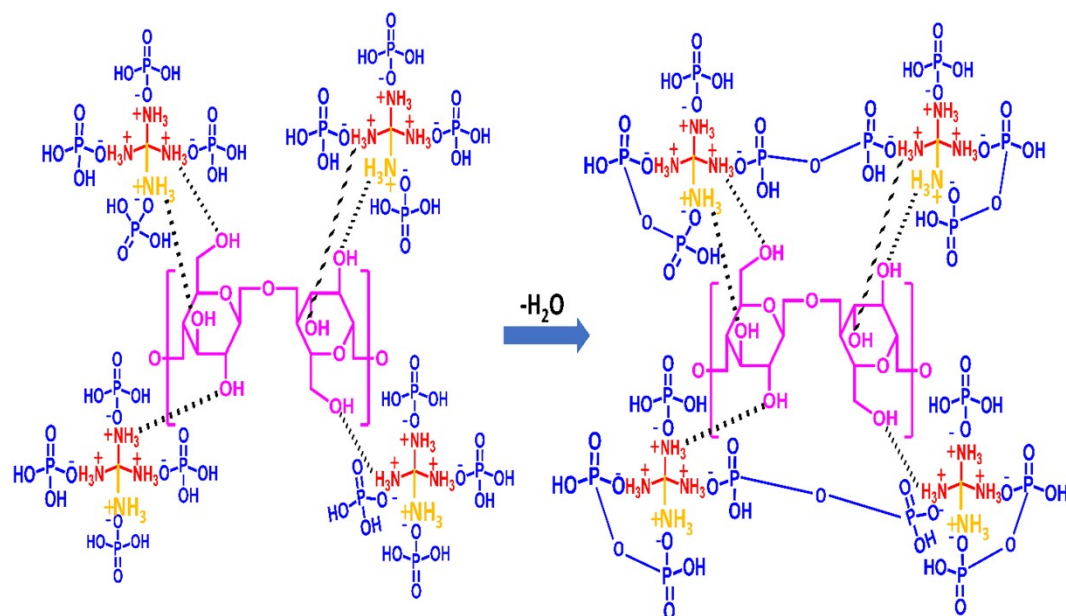

**Figure S10:** Schematic representation for the proposed dehydration of the FR-4 by forming phosphoanhydride by intramolecular as well as intermolecular reaction.

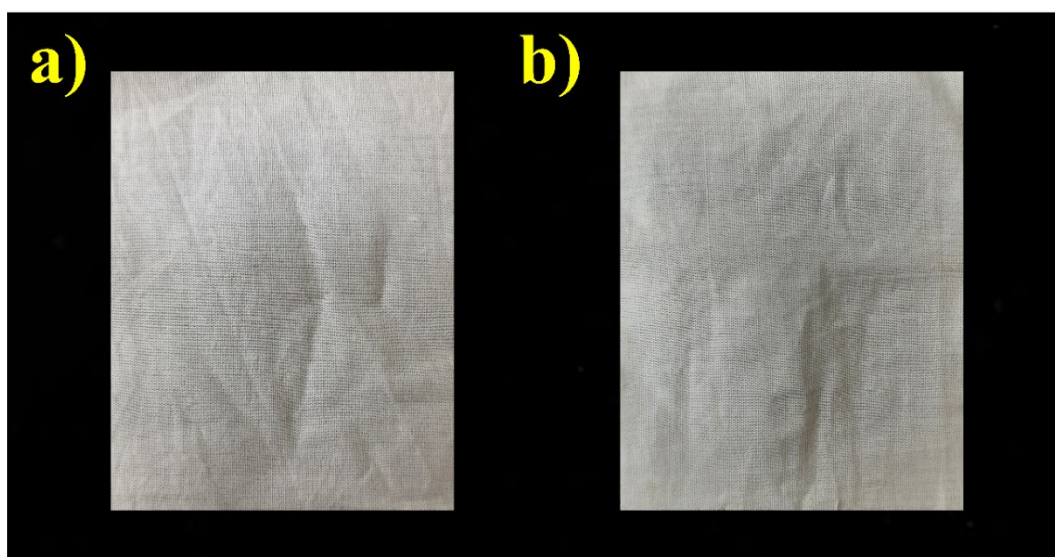

**Figure S11.** Digital photograph of (a) Blank sample, (b) FR-4@Cotton fabric

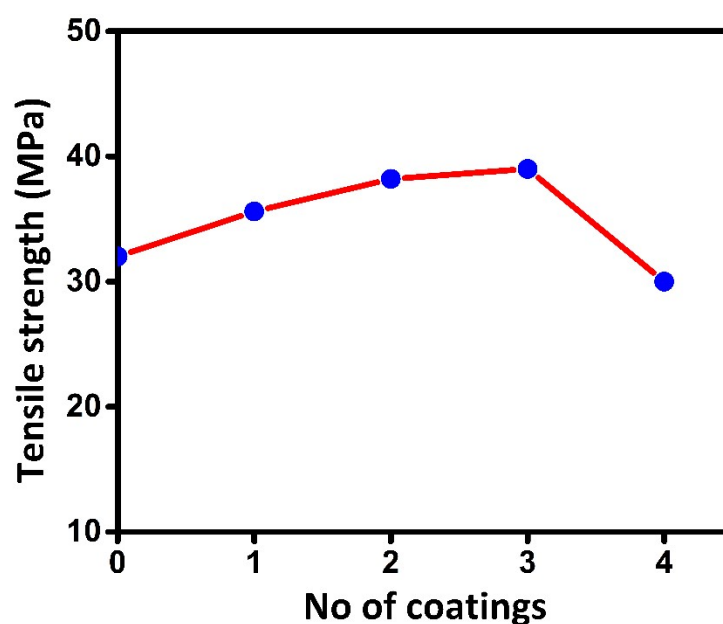

**Figure S12.** Tensile strength of FR-4@Cotton fabric

The durability of FR-4@Cotton fabric, we examined with tensile strength test. The tensile strength of FR-4@Cotton fabric was measured by using reported method in which we observed that the trend of tensile strength of FR-4@Cotton fabric was increased. The maximum tensile strength was observed of FR-4@Cotton fabric for 3<sup>rd</sup> no of coating and after that the tensile strength of FR-4@Cotton was gradual decreased. The tensile strength results of FR-4@Cotton fabric is summarized in **Figure S12**.

**Table S1:** The Weight % and stoichiometric feed ratio of carbon, oxygen, nitrogen and phosphorous of FR-1 to FR-4 material based on XPS data

| Sr. No. | Name of FR Composite material | Carbon   |                      | Oxygen   |                      | Nitrogen |                      | Phosphorous |                      |
|---------|-------------------------------|----------|----------------------|----------|----------------------|----------|----------------------|-------------|----------------------|
|         |                               | Weight % | Stoichiometric ratio | Weight % | Stoichiometric ratio | Weight % | Stoichiometric ratio | Weight %    | Stoichiometric ratio |
| 1       | FR-1                          | 12       | 0.99 (~1)            | 44       | 3.82 (~4)            | 32       | 2.89 (~3)            | 12          | 0.99 (~1)            |
| 2       | FR-2                          | 9        | 0.85 (~1)            | 56       | 7.92 (~8)            | 21       | 2.84 (~3)            | 14          | 1.89 (~2)            |
| 3       | FR-3                          | 8        | 0.78 (~1)            | 60       | 11.95 (~12)          | 16       | 2.85 (~3)            | 16          | 2.95 (~3)            |
| 4       | FR-4                          | 6        | 0.77 (~1)            | 64       | 16.02 (~16)          | 15       | 3.78 (~4)            | 15          | 3.85 (~4)            |

**Table No. S2:** LOI (%) value of synthesized material coated cotton fabric with respect to no of coating.

| No of coating           | Guanidine + PA (1:1)<br>(FR-1@cotton fabric) | Guanidine + PA (1:2)<br>(FR-2@cotton fabric) | Guanidine + PA (1:3)<br>(FR-3@cotton fabric) | Guanidine + NH <sub>4</sub> OH + PA (1:1:4)<br>(FR-4@cotton fabric) |
|-------------------------|----------------------------------------------|----------------------------------------------|----------------------------------------------|---------------------------------------------------------------------|
| 1 <sup>st</sup> Coating | 35                                           | 40                                           | 48                                           | 50                                                                  |
| 2 <sup>nd</sup> Coating | 37                                           | 42                                           | 50                                           | 52                                                                  |
| 3 <sup>rd</sup> Coating | 40                                           | 46                                           | 51                                           | 53                                                                  |
| 4 <sup>th</sup> Coating | 43                                           | 48                                           | 53                                           | 55                                                                  |

\*The LOI of blank cotton fabric was 16%.

**Table No. S3:** Comparative data of synthesized material with reported material

| Sr. No. | Flame retardant material                                                                    | LOI  | Reference        |
|---------|---------------------------------------------------------------------------------------------|------|------------------|
| 1.      | Thiourea, phosphoric acid, PCl <sub>5</sub> , ethanolamine, urea                            | 48.2 | [1]              |
| 2.      | Formaldehyde, melamine, anhydrous H <sub>3</sub> PO <sub>3</sub> , urea                     | 43.0 | [2]              |
| 3.      | alkylammonium functional silsesquioxane, phytic acid                                        | 29   | [3]              |
| 4.      | Glycerol, phosphoric acid, urea                                                             | 33.7 | [4]              |
| 5.      | Diethyl chlorophosphite, Methacrylamide, Triethylamine                                      | 30.2 | [5]              |
| 6.      | Casein, dimethyl phosphite, formaldehyde, phosphoric acid (H <sub>3</sub> PO <sub>3</sub> ) | 41.6 | [6]              |
| 7.      | Guanidine, phosphoric acid (FR-1)                                                           | 43   | <b>This Work</b> |
| 8.      | Guanidine, phosphoric acid (FR-2)                                                           | 48   | <b>This Work</b> |
| 9.      | Guanidine, phosphoric acid (FR-3)                                                           | 53   | <b>This Work</b> |
| 10.     | Guanidine hydrochloride, ammonium hydroxide, Phosphoric acid (FR-4)                         | 55   | <b>This Work</b> |



**Table No. S4:** Vertical flammability data of control cotton fabric with flame retardant material coated cotton fabric.

| <b>Flammability parameter</b>                         | <b>Blank Cotton fabric</b> | <b>Guanidine + PA (1:1)<br/>(FR-1@cotton fabric)</b> | <b>Guanidine + PA (1:2)<br/>(FR-2@cotton fabric)</b> | <b>Guanidine + PA (1:3)<br/>(FR-3@cotton fabric)</b> | <b>Guanidine + NH<sub>4</sub>OH + PA (1:1:4)<br/>(FR-4@cotton fabric)</b> |
|-------------------------------------------------------|----------------------------|------------------------------------------------------|------------------------------------------------------|------------------------------------------------------|---------------------------------------------------------------------------|
| Occurring flashing over the surface                   | Yes                        | No                                                   | No                                                   | 0                                                    | 0                                                                         |
| Burning with flame time (s)                           | 17                         | 0                                                    | 0                                                    | 0                                                    | 0                                                                         |
| Burning with afterglow time (s)<br>After flame stop   | 0                          | 0                                                    | 0                                                    | 0                                                    | 0                                                                         |
| Total burning time (s) (Flame time + after glow time) | 17                         | 0                                                    | 0                                                    | 0                                                    | 0                                                                         |
| Char length (cm)                                      | Nil                        | 5                                                    | 4                                                    | 3.5                                                  | 3                                                                         |

**Table No S5:** Comparative data of as synthesized material with respect to LOI, VFT and observation observed in spirit lamp test.

| <b>Sr. No.</b> | <b>FR material</b> | <b>Composition</b>                                   | <b>LOI (%)</b> | <b>VFT (cm)</b> | <b>Observation observed in Spirit lamp test</b>                                                                                    |
|----------------|--------------------|------------------------------------------------------|----------------|-----------------|------------------------------------------------------------------------------------------------------------------------------------|
| 1.             | FR-1@cotton fabric | Guanidine + Phosphoric acid (1:1)                    | 43             | 5               | Acted as a good FR material but shrink the cotton fabric and sustained up to 327 s.                                                |
| 2.             | FR-2@cotton fabric | Guanidine + Phosphoric acid (1:2)                    | 48             | 4               | Improved FR efficiency and performed effective FR material but shrink the cotton fabric and sustained up to 424 s.                 |
| 3.             | FR-3@cotton fabric | Guanidine + Phosphoric acid (1:3)                    | 53             | 3.5             | Improved FR efficiency and performed efficient FR material but shrink the cotton fabric and sustained up to 470 s.                 |
| 4.             | FR-4@cotton fabric | Guanidine + ammonium hydroxide Phosphoric acid (1:1) | 55             | 3               | Improved FR efficiency and performed as a highly effective FR material without changing its initial shape and sustain up to 492 s. |

**Table S6:** Wash fastness Data of FR-4@Cotton fabric without and with Binder/FR-4@Cotton fabric before and after washing % weight loss

| Sr. No. | Sample                    | Before Washing |         |                  | After 1 <sup>st</sup> Washing |         |                  | % weight loss |
|---------|---------------------------|----------------|---------|------------------|-------------------------------|---------|------------------|---------------|
|         |                           | Weight (gm)    | LOI (%) | Char length (cm) | Weight (gm)                   | LOI (%) | Char length (cm) |               |
| 1       | FR-4@Cotton Fabric        | 1.1006         | 55      | 3                | 0.7526                        | 45.5    | 5                | 31.61         |
| 2       | Binder/FR-4@Cotton Fabric | 1.1021         | 54.5    | 3.2              | 0.9695                        | 52.1    | 3.6              | 12.03         |

The wash fastness data of synthesized FR-4@Cotton fabric was tested by ISO2 method.<sup>29</sup> FR-4@Cotton fabric was washed with 5 g/L of soap solution with liquor ratio 50:1 at 50 °C for 45 min, after rinsed properly with water and dried it in air. We observed maximum ~31.61 % weight loss in case of FR-4@Cotton fabric after washing. Whereas, only ~12.03 % of weight loss is observed, by using Saraprint AC as a binder.<sup>29</sup>

**Table No S7:** Add on % data of FR-1 material on cotton fabric

| Sr. No. | Weight of cotton fabric (g) | No. of coatings         | Weight FR-1@cotton cloth (g) | FR-1 Load (%) | Results after exposure to similar flame (Spirit lamp test)                               |
|---------|-----------------------------|-------------------------|------------------------------|---------------|------------------------------------------------------------------------------------------|
| 1.      | 0.640                       | 1 <sup>st</sup> Coating | 0.743                        | ~16           | Served as a moderate FR material towards cotton fabric.                                  |
| 2.      | 0.638                       | 2 <sup>nd</sup> Coating | 0.759                        | ~19           | Improved FR efficiency and showed good FR performance towards cotton fabric.             |
| 3.      | 0.638                       | 3 <sup>rd</sup> Coating | 0.781                        | ~22           | Improved FR efficiency and performed effective FR performance towards the cotton fabric. |
| 4.      | 0.639                       | 4 <sup>th</sup> Coating | 0.806                        | ~26           | Improved FR efficiency and performed excellent FR performance towards cotton fabric.     |

**Table No S8:** Add on % data of FR-2 material on cotton fabric

| Sr. No. | Weight of cotton fabric (g) | No. of coatings         | Weight FR-2@cotton cloth (g) | FR-2 Load (%) | Results after exposure to similar flame (Spirit lamp test)                        |
|---------|-----------------------------|-------------------------|------------------------------|---------------|-----------------------------------------------------------------------------------|
| 1.      | 0.639                       | 1 <sup>st</sup> Coating | 0.749                        | ~17           | Served as a good FR material towards cotton fabric.                               |
| 2.      | 0.640                       | 2 <sup>nd</sup> Coating | 0.769                        | ~20           | Improved FR efficiency and showed effective FR performance towards cotton fabric. |
|         |                             |                         |                              |               | Improved FR efficiency and performed                                              |

|    |       |                            |       |     |                                                                                        |
|----|-------|----------------------------|-------|-----|----------------------------------------------------------------------------------------|
| 3. | 0.638 | 3 <sup>rd</sup><br>Coating | 0.785 | ~23 | excellent FR performance towards the cotton fabric.                                    |
| 4. | 0.636 | 4 <sup>th</sup><br>Coating | 0.815 | ~28 | Improved FR efficiency and performed outstanding FR performance towards cotton fabric. |

**Table No S9:** Add on % data of FR-3 material on cotton fabric

| Sr. No. | Weight of cotton fabric (g) | No. of coatings            | Weight FR-3@ cotton cloth (g) | FR-3 Load (%) | Results after exposure to similar flame (Spirit lamp test)                                    |
|---------|-----------------------------|----------------------------|-------------------------------|---------------|-----------------------------------------------------------------------------------------------|
| 1.      | 0.639                       | 1 <sup>st</sup><br>Coating | 0.755                         | ~18           | Served as a effective FR material towards cotton fabric.                                      |
| 2.      | 0.640                       | 2 <sup>nd</sup><br>Coating | 0.781                         | ~22           | Improved FR efficiency and showed excellent FR performance towards cotton fabric.             |
| 3.      | 0.638                       | 3 <sup>rd</sup><br>Coating | 0.798                         | ~25           | Improved FR efficiency and performed very effective FR performance towards the cotton fabric. |
| 4.      | 0.638                       | 4 <sup>th</sup><br>Coating | 0.832                         | ~30           | Improved FR efficiency and performed outstanding FR performance towards cotton fabric.        |

**Table No S10:** Add on % data of FR-4 material on cotton fabric

| Sr. No. | Weight of cotton fabric (g) | No. of coatings            | Weight FR-4@ cotton cloth (g) | FR-4 Load (%) | Results after exposure to similar flame (Spirit lamp test)                                 |
|---------|-----------------------------|----------------------------|-------------------------------|---------------|--------------------------------------------------------------------------------------------|
| 1.      | 0.640                       | 1 <sup>st</sup><br>Coating | 0.769                         | ~20           | Served as a excellent FR material towards cotton fabric.                                   |
| 2.      | 0.639                       | 2 <sup>nd</sup><br>Coating | 0.794                         | ~24           | Improved FR efficiency and showed very effective FR performance towards cotton fabric.     |
| 3.      | 0.640                       | 3 <sup>rd</sup><br>Coating | 0.827                         | ~29           | Improved FR efficiency and performed outstanding FR performance towards the cotton fabric. |
| 4.      | 0.641                       | 4 <sup>th</sup><br>Coating | 0.853                         | ~33           | Improved FR efficiency and performed magnificent FR performance towards cotton fabric.     |

**Table No. S11.** Bending length and stiffness data of FR@Cotton fabric.

| Sr. No. | Name of FR@Cotton fabric | Whiteness |      | Whiteness |
|---------|--------------------------|-----------|------|-----------|
|         |                          | Warp      | Weft |           |
| 1.      | Control                  | 1.5       | 1.4  | 127       |
| 2.      | FR-1@Cotton fabric       | 1.7       | 1.6  | 128.159   |
| 3.      | FR-2@Cotton fabric       | 1.8       | 1.7  | 131.884   |
| 4.      | FR-3@Cotton fabric       | 1.9       | 1.8  | 132.074   |

|    |                    |     |     |         |
|----|--------------------|-----|-----|---------|
| 5. | FR-4@Cotton fabric | 2.1 | 2.0 | 132.300 |
|----|--------------------|-----|-----|---------|

## References:

- [1] Caiyan Wan, Mingsheng Liu, Pingping He, Guangxian Zhang, Fengxiu Zhang, A novel reactive flame retardant for cotton fabric based on a thiourea-phosphoric acid polymer, *Industrial Crops & Products* 154 (2020) 112625.
- [2] Fengxiu Zhang, Weiwei Gao, Yaling Jia, Yi Lu, Guangxian Zhang, A concise water-solvent synthesis of highly effective, durable, and eco-friendly flame-retardant coating on cotton fabrics, *Carbohydrate Polymers* 199 (2018) 256–265
- [3] Guo WW, Wang X, Huang JL, Zhou YF, Cai W, Wang JL, Song L, Hu Y (2020) Construction of durable flameretardant and robust superhydrophobic coatings on cotton fabrics for water-oil separation application, *Chemical Engineering Journal* 398 (2020) 125661.
- [4] Jinfeng Li, Wei Jiang, Maolin Liu, Durable phosphorus/nitrogen flame retardant for cotton fabric, *Cellulose* (2022) 29:4725–4751.
- [5] Ying Liu, Li Zhou, Fang Ding, Shanshan Li, Rong Li, Zhiguang Li, Dan Huang and Xuehong Ren, Flame-retardant cotton fabrics modified with phosphoramidate derivative via electron beam irradiation process, DOI: 10.1177/1528083719881816.
- [6] Fang Xu. Guangxian Zhang. Peng Wang. Fangyin Dai, Durable and high-efficiency casein-derived phosphorusnitrogen-rich flame retardants for cotton fabrics, *Cellulose* (2022) 29:2681–2697.
